# Supplementary material for: Embedding Au nanoclusters into the pores of carboxylated COF for the efficient photocatalytic production of hydrogen peroxide
Source: Royal Society of Chemistry journal article supplement (doi:10.1039/d3ta03966h), 2023-01-01
Supplement: d3ta03966h1.pdf [file d3ta03966h1.pdf]

## **Embedding Au nanoclusters into the pores of carboxylated COF for efficient photocatalytic production of hydrogen peroxide**

Qigao Shang <sup>a</sup>, Yanyang Liu <sup>a</sup>, Jing Ai <sup>a</sup>, Ying Yan <sup>a</sup>, Xiaofang Yang <sup>b</sup>, Dongsheng Wang <sup>c</sup>, Guiying Liao <sup>a,\*</sup>

<sup>a</sup>Faculty of Materials Science and Chemistry, China University of Geosciences, Wuhan 430074, P. R. China.

<sup>b</sup>State Key Laboratory of Environmental Aquatic Chemistry, Research Center for Eco-Environmental Sciences, Chinese Academy of Sciences, Beijing 100085, China

<sup>c</sup> College of Environmental & Resource Sciences, Zhejiang University, Hangzhou 310058, 14 China

### **Corresponding authors:**

(Guiying Liao) E-mail: [liaogy@cug.edu.cn](mailto:liaogy@cug.edu.cn)

**Total number of pages: 11**

**Total number of Tables: 2**

**Total number of Figures: 6**

## Physical Measurements

Fourier transform infrared (**FT-IR**) spectra were observed on a Thermal Nicolet iS50 spectrometer using powder samples embedded in potassium bromide (KBr) pellets. The solid state  $^{13}\text{C}$  cross-polarization magic angle spinning (**CP/MAS**) NMR spectra were taken in a Bruker 300 MHz NMR spectrometer. Powder X-ray diffraction (**XRD**) was performed on a Bruker D8 Advance X-ray diffractometer with Ni-filtered  $\text{Cu K}\alpha$  radiation ( $\lambda = 0.154178$  nm) at 40 kV ranging from  $3^\circ$  to  $90^\circ$ . The morphologies of the samples were investigated by field emission scanning electron microscopy (**SEM**, SU-70, Hitachi). The high-resolution transmission electron microscopy (**HRTEM**) images were performed on JEM 2100 electron microscope (JEOL, Japan). The UV-vis diffuse reflectance spectra (**UV-vis DRS**) of the samples were measured on a UV-visible spectrophotometer (UV-2600, Shimadzu Corp., Japan), with an integrating sphere attachment and  $\text{BaSO}_4$  reference. X-ray photoelectron spectroscopy (**XPS**) measurements were tested on an Axis Ultra DLD using C1s (284.8 eV) as a reference to correct the binding energy. The Brunauer-Emmett-Teller (**BET**) surface areas and nitrogen adsorption/desorption isotherms were measured at 77 K using Micromeritics ASAP2460 equipment. The pore size distribution was derived from the adsorption branch of  $\text{N}_2$  isotherms using the nonlocal density functional theory (NLDFIT) method, and the total pore volume was

evaluated through nitrogen uptake at P/P0 of 0.99. Electron paramagnetic spectroscopy (**EPR**) were measured on a Bruker EMX plus model spectrometer.

## Materials

4-Aminobenzonitrile, Trifluoromethanesulfonic acid, 1,3,5-Triformylbenzene, Mesitylene, Pyruvic acid, Glutathione (GSH), were purchased from Shanghai Aladdin Chemistry Co. 1,4-Dioxane, Acetic Acid, p-toluenesulfonic Acid,  $\text{HAuCl}_4 \cdot 3\text{H}_2\text{O}$ , Ethanol, Methanol, Benzyl alcohol (BA), propan-2-ol (IPA) and tetrahydrofuran (THF) were purchased from Sinopharm Chemical Reagent Co., Ltd.

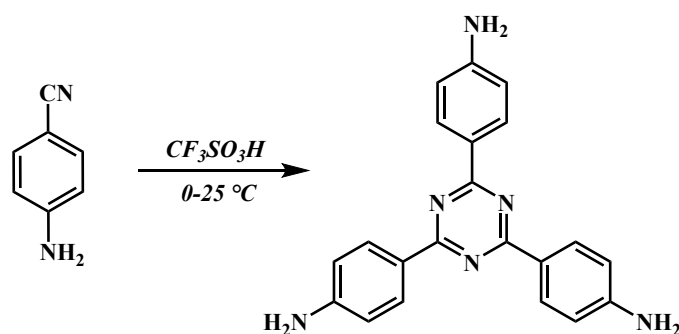

**Scheme S1.** Synthesis of TAPT monomer.

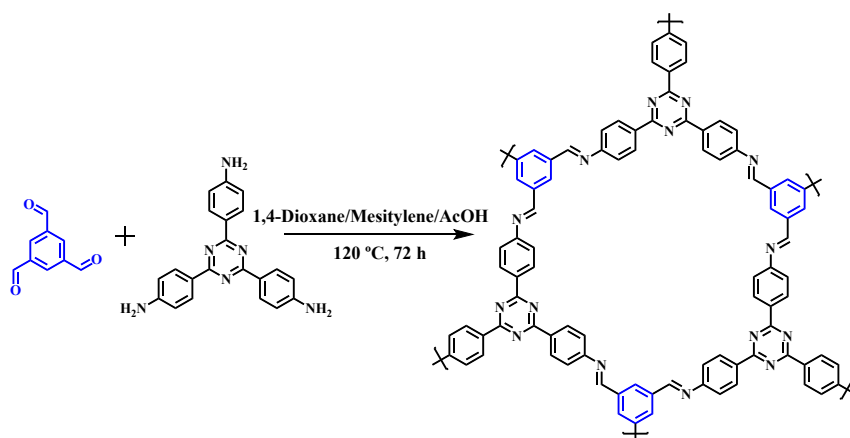

**Scheme S2.** Synthesis of T-COF

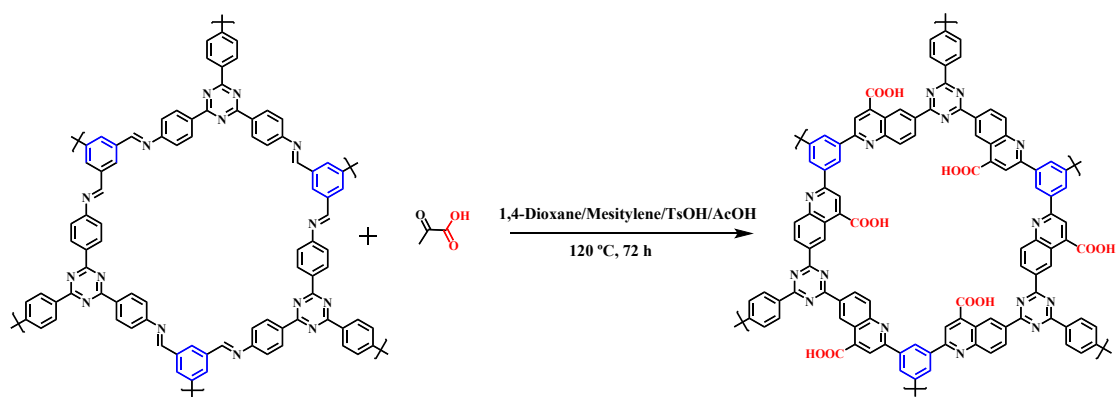

**Scheme S3.** Synthesis of COF-COOH

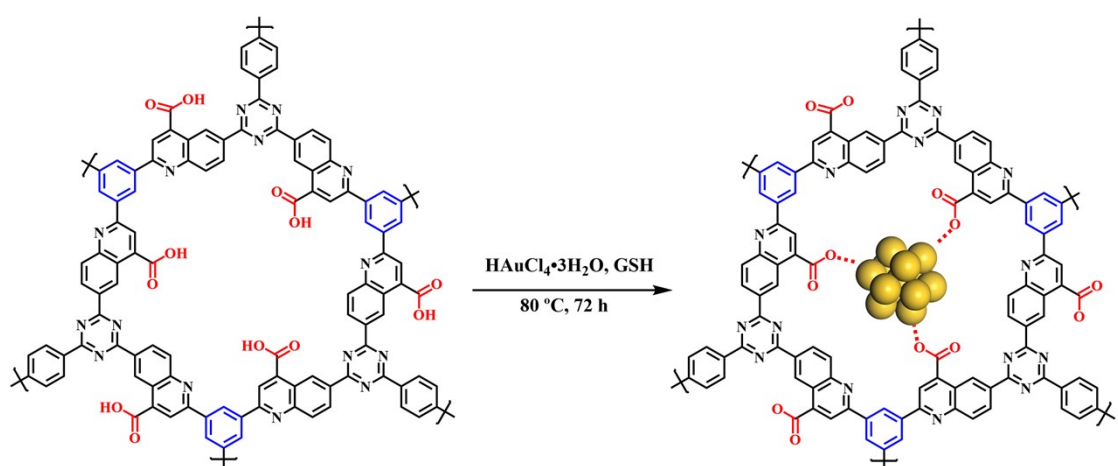

**Scheme S4.** Synthesis of Au@COF

### Iodometry:

The amount of  $\text{H}_2\text{O}_2$  was determined by iodometry. Typically, 1 mL of 0.1 M  $\text{C}_8\text{H}_5\text{KO}_4$  solution and 1 mL of 0.4 M KI solution were added into 2 mL of the reaction solution and kept for 30 min.  $\text{H}_2\text{O}_2$  can react with  $\text{I}^-$  under acidic conditions to form  $\text{I}^{3-}$  ( $\text{H}_2\text{O}_2 + 3\text{I}^- + 2\text{H}^+ \rightarrow \text{I}^{3-} + 2\text{H}_2\text{O}$ ). The amount of  $\text{I}^{3-}$  was determined by measuring the absorbance at 350 nm by UV-vis spectroscopy, from which the total amount of  $\text{H}_2\text{O}_2$  produced during the photocatalytic reaction can be calculated, **Figure S1** shows the

standard curve of H<sub>2</sub>O<sub>2</sub>.

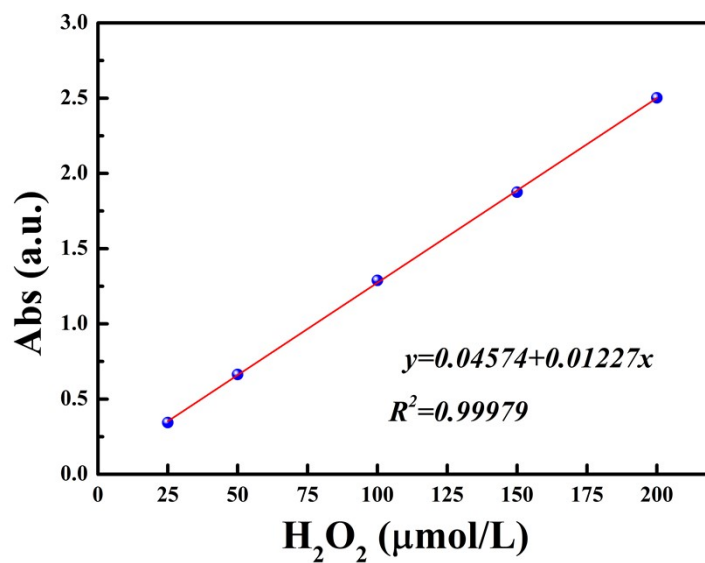

Figure S1. The linear fitting formula of standard H<sub>2</sub>O<sub>2</sub> concentration.

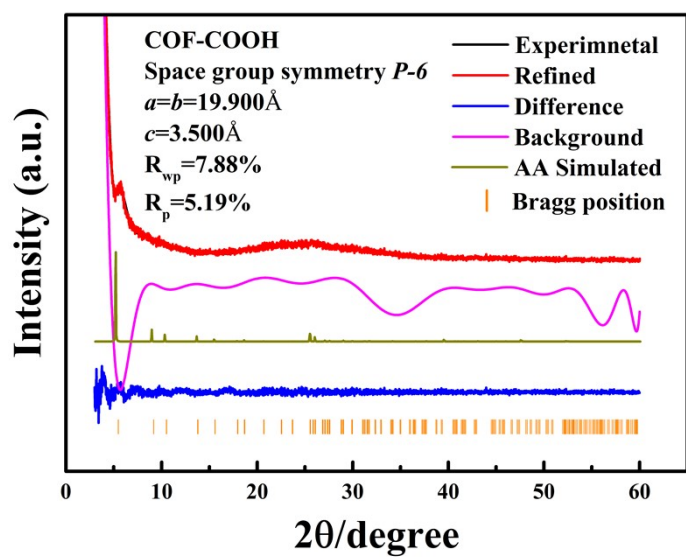

Figure S2. Experimental and simulated PXRD patterns of COF-COOH.

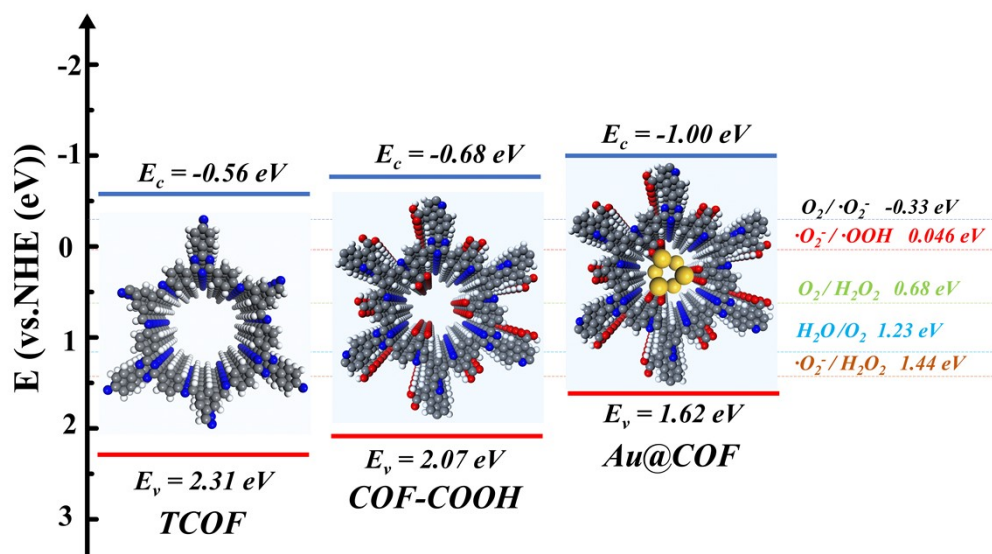

Figure S3. Band structure diagram of TCOF, COF-COOH and Au@COF.

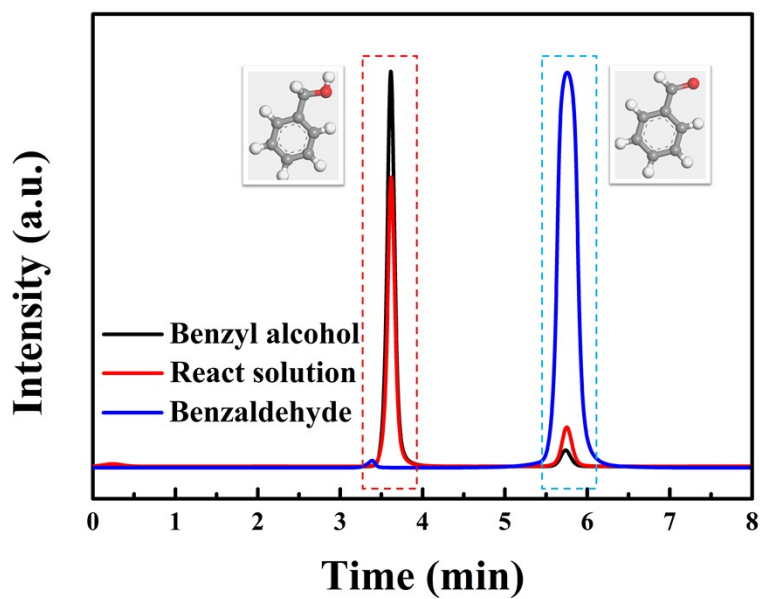

Figure S4. The HPLC of benzyl alcohol, reaction solution and benzaldehyde.

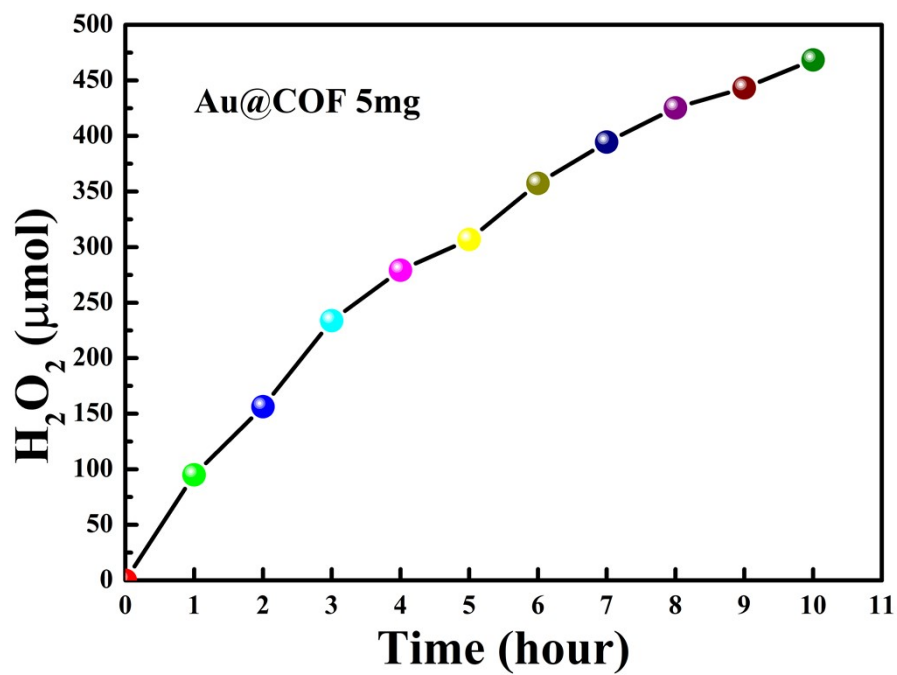

Figure S5. Au@COF photocatalytic H<sub>2</sub>O<sub>2</sub> production performance

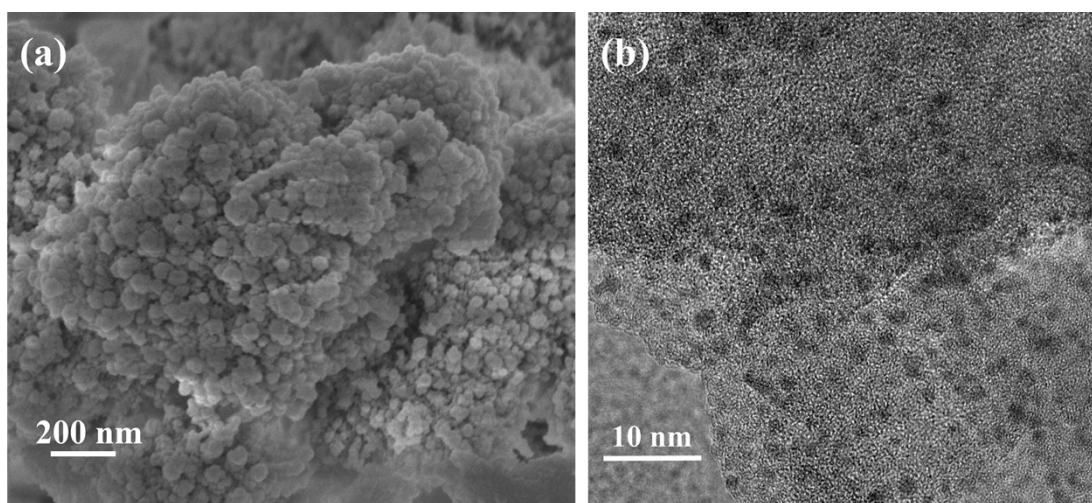

Figure S6. (a) SEM and (b) TEM of Au@COF after five cycles of photocatalysis

**Table S1.** Atomistic coordinates for the Pawley-refined COF-COOH.

| Eclipsed mode                                                                                                                                |         |         |         |
|----------------------------------------------------------------------------------------------------------------------------------------------|---------|---------|---------|
| Space group symmetry $p-6$ , $a=b=19.900$ Å, $c=3.500$ Å, $\alpha=\gamma=90^\circ$ , $\beta=120^\circ$ ,<br>$R_p=5.19\%$ and $R_{wp}=7.18\%$ |         |         |         |
| Atom                                                                                                                                         | x       | y       | z       |
| C1                                                                                                                                           | 0.00391 | 0.00391 | -0.0000 |
| C2                                                                                                                                           | 0.08700 | 0.03511 | -0.0000 |
| C3                                                                                                                                           | 0.17572 | 0.07110 | -0.0000 |
| C4                                                                                                                                           | 0.21195 | 0.01854 | -0.0000 |
| C5                                                                                                                                           | 0.22807 | 0.15987 | -0.0000 |
| C6                                                                                                                                           | 0.30078 | 0.05496 | -0.0000 |
| C7                                                                                                                                           | 0.31700 | 0.19651 | -0.0000 |
| C8                                                                                                                                           | 0.35331 | 0.14385 | -0.0000 |
| C9                                                                                                                                           | 0.37017 | 0.28543 | -0.0000 |
| C10                                                                                                                                          | 0.45868 | 0.32006 | -0.0000 |
| C11                                                                                                                                          | 0.49318 | 0.26601 | -0.0000 |
| C12                                                                                                                                          | 0.57804 | 0.29833 | -0.0000 |
| C13                                                                                                                                          | 0.61300 | 0.24465 | -0.0000 |
| H14                                                                                                                                          | 0.04725 | 0.22030 | -0.0000 |
| H15                                                                                                                                          | 0.20075 | 0.19826 | -0.0000 |
| H16                                                                                                                                          | 0.32772 | 0.01611 | -0.0000 |
| H17                                                                                                                                          | 0.45252 | 0.44274 | -0.0000 |
| H18                                                                                                                                          | 0.49869 | 0.38569 | -0.0000 |
| H19                                                                                                                                          | 0.57328 | 0.17897 | -0.0000 |
| N20                                                                                                                                          | 0.03515 | 0.94809 | -0.0000 |
| N21                                                                                                                                          | 0.44046 | 0.17901 | -0.0000 |
| O22                                                                                                                                          | 0.03626 | 0.60925 | -0.0000 |
| O23                                                                                                                                          | 0.05863 | 0.75014 | -0.0000 |



**Table S2.** summarized the performance of Au@COF compared to various photocatalysts reported in recent years for the photocatalytic generation of H<sub>2</sub>O<sub>2</sub>.

| <i>Material</i>                                                      | <i>solution</i>                             | <i>Photocatalyst Concentration mL/mg</i> | <i>H<sub>2</sub>O<sub>2</sub> yields/ <math>\mu\text{mol g}^{-1} \text{h}^{-1}</math></i> | <i>H<sub>2</sub>O<sub>2</sub> yields/ <math>\mu\text{mol h}^{-1}</math></i> | <i>Irradiation conditions /nm</i>      | <i>Ref.</i>      |
|----------------------------------------------------------------------|---------------------------------------------|------------------------------------------|-------------------------------------------------------------------------------------------|-----------------------------------------------------------------------------|----------------------------------------|------------------|
| <b>COF-COOH</b>                                                      | 10 vol% BA                                  | 50/5                                     | <b>9479.60</b>                                                                            | <b>47.40</b>                                                                | Simulated sunlight                     | <b>This work</b> |
| <b>Au@COF</b>                                                        | 10 vol% BA                                  | 50/5                                     | <b>18933.58</b>                                                                           | <b>94.67</b>                                                                |                                        |                  |
| 1H-COF                                                               | 10 vol% IPA                                 | 30/ 30                                   | 1483.33                                                                                   | 44.50                                                                       | $\lambda \geq 420$                     | S1               |
| Bpy-TAPT                                                             | Pure water                                  | 30/5                                     | 4038.00                                                                                   | 20.19                                                                       | $\lambda \geq 420$                     | S2               |
| ZIF-8/C <sub>3</sub> N <sub>4</sub>                                  | Pure water                                  | 15/10                                    | 2641.00                                                                                   | 26.41                                                                       | $420 \leq \lambda \leq 700$            | S3               |
| COF-NUST-16                                                          | 10 vol% EtOH                                | 50/5                                     | 1081.00                                                                                   | 5.40                                                                        | $\lambda \geq 420$                     | S4               |
| Py-Da-COF                                                            | 10 vol% BA                                  | 5/5                                      | 3670.00                                                                                   | 18.35                                                                       | $\lambda \geq 420$                     | S5               |
| EBA-COF                                                              | 10 vol% BA                                  | 2.5/10                                   | 2550.00                                                                                   | 25.50                                                                       | $\lambda = 420$                        | S6               |
| COF-TAPB-BPDA                                                        | 5 vol% BA                                   | 25/5                                     | 1240.00                                                                                   | 6.20                                                                        | $\lambda \geq 420$                     | S7               |
| TPB-DMTP-COF                                                         | Pure water                                  | 50/10                                    | 2882.00                                                                                   | 28.82                                                                       | $\lambda \geq 420$                     | S8               |
| Bpt-CTF                                                              | Pure water                                  | 50/10                                    | 3268.10                                                                                   | 32.68                                                                       | $350 \leq \lambda \leq 780$            | S9               |
| TF <sub>50</sub> -COF                                                | 10 vol% EtOH                                | 50/5                                     | 1739.00                                                                                   | 8.70                                                                        | $\lambda \geq 400$                     | S10              |
| N0-COF                                                               | Pure water                                  | 20/10                                    | 1570.00                                                                                   | 15.70                                                                       | 495 nm LED                             | S11              |
| sonoCOF-F2                                                           | 10 vol% BA                                  | 5/3                                      | 2422.22                                                                                   | 7.27                                                                        | $\lambda \geq 420$                     | S12              |
| DE7-M                                                                | Sc(NO <sub>3</sub> ) <sub>3</sub><br>150 mM | 3/5                                      | 2216.67                                                                                   | 11.08                                                                       | $\lambda \geq 420$                     | S13              |
| Nv-C≡N-CN                                                            | Pure water                                  | 20/20                                    | 3930.00                                                                                   | 78.60                                                                       | $\lambda \geq 420$                     | S14              |
| Cu <sub>2</sub> (OH)PO <sub>4</sub> /g-C <sub>3</sub> N <sub>4</sub> | Pure water                                  | 200/200                                  | 1200.00                                                                                   | 240.00                                                                      | Simulated sunlight                     | S15              |
| Au/ZnO                                                               | 4vol%EtOH                                   | 200/200                                  | 1525.00                                                                                   | 305.00                                                                      | UV light                               | S16              |
| ZnIn <sub>2</sub> S <sub>4</sub> /TiO <sub>2</sub>                   | Pure water                                  | 50/30                                    | 1530.59                                                                                   | 45.92                                                                       | $400 \text{ nm} \leq \lambda \leq 760$ | S17              |
| Ni-CAT-CN                                                            | Pure water                                  | 15/10                                    | 1801.05                                                                                   | 18.01                                                                       | $\lambda \geq 420$                     | S18              |
| ZnO@PDA                                                              | Pure water                                  | 50/20                                    | 2528.50                                                                                   | 50.57                                                                       | 300 W Xenon lamp                       | S19              |
| ZnO/g-C <sub>3</sub> N <sub>4</sub>                                  | 10 vol% EtOH                                | 50/20                                    | 3860.00                                                                                   | 77.20                                                                       | $\lambda \geq 350$                     | S20              |
| Pt/TiO <sub>2</sub>                                                  | Pure water                                  | 20/1                                     | 5096.00                                                                                   | 5.10                                                                        | $\lambda \geq 300$                     | S21              |
| ZnO/WO <sub>3</sub>                                                  | 10 vol% EtOH                                | 50/50                                    | 6788.00                                                                                   | 339.40                                                                      | $300 \leq \lambda \leq 700$            | S22              |
| OPA/Zr <sub>100-x</sub> Tix-MOF                                      | 71.4 vol% BA                                | 7/5                                      | 13580.00                                                                                  | 67.9                                                                        | $\lambda \geq 420$                     | S23              |
| HTNT-CD                                                              | Pure water                                  | 15/20                                    | 4235.00                                                                                   | 84.7                                                                        | $\lambda \geq 365$                     | S24              |
| MIL-125-PDI                                                          | 80/ CH <sub>3</sub> CN                      | 5/5                                      | 4800.00                                                                                   | 24.00                                                                       | $\lambda \geq 420$                     | S25              |

## References

- [S1]. H. Hu, Y. Tao, D. Wang, C. Li, Q. Jiang, Y. Shi, J. Wang, J. Qin, S. Zhou and Y. Kong, *J. Colloid Interface Sci.*, 2023, **629**, 750-762.
- [S2]. Y. Liu, W.-K. Han, W. Chi, Y. Mao, Y. Jiang, X. Yan and Z.-G. Gu, *Appl. Catal. B.*, 2023, **331**, 122691.
- [S3]. Y. Zhao, Y. Liu, J. Cao, H. Wang, M. Shao, H. Huang, Y. Liu and Z. Kang, *Appl. Catal. B.*, 2020, **278**, 119289.
- [S4]. M. Wu, Z. Shan, J. Wang, T. Liu and G. Zhang, *Chem. Eng. J.*, 2023, **454**, 140121.
- [S5]. J. Sun, H. Sekhar Jena, C. Krishnaraj, K. Singh Rawat, S. Abednatanzi, J. Chakraborty, A. Laemont, W. Liu, H. Chen, Y.-Y. Liu, K. Leus, H. Vrielinck, V. Van Speybroeck and P. Van Der Voort, *Angew. Chem. Int. Ed.*, 2023, **n/a**, e202216719.
- [S6]. L. Zhai, Z. Xie, C.-X. Cui, X. Yang, Q. Xu, X. Ke, M. Liu, L.-B. Qu, X. Chen and L. Mi, *Chem. Mater.*, 2022, **34**, 5232-5240.
- [S7]. T. Yang, Y. Chen, Y. Wang, X. Peng and A. Kong, *ACS Appl. Mater.*, 2023, **15**, 8066-8075.
- [S8]. L. Li, L. Xu, Z. Hu and J. C. Yu, *Adv. Funct. Mater.*, 2021, **31**, 2106120.
- [S9]. C. Wu, Z. Teng, C. Yang, F. Chen, H. B. Yang, L. Wang, H. Xu, B. Liu, G. Zheng and Q. Han, *Adv. Mater.*, 2022, **34**, 2110266.
- [S10]. H. Wang, C. Yang, F. Chen, G. Zheng and Q. Han, *Angew. Chem. Int. Ed.*, 2022, **61**, e202202328.
- [S11]. S. Chai, X. Chen, X. Zhang, Y. Fang, R. S. Sprick and X. Chen, *Environ. Sci. Nano.*, 2022, **9**, 2464-2469.
- [S12]. W. Zhao, P. Yan, B. Li, M. Bahri, L. Liu, X. Zhou, R. Clowes, N. D. Browning, Y. Wu, J. W. Ward and A. I. Cooper, *J. Ame. Chem. Soc.*, 2022, **144**, 9902-9909.
- [S13]. L. Liu, M.-Y. Gao, H. Yang, X. Wang, X. Li and A. I. Cooper, *J. Ame. Chem. Soc.*, 2021, **143**, 19287-19293.
- [S14]. X. Zhang, P. Ma, C. Wang, L. Gan, X. Chen, P. Zhang, Y. Wang, H. Li, L.

- Wang, X. Zhou and K. Zheng, *Energy Environ. Sci.*, 2022, **15**, 830-842.
- [S15]. X. Wang, Z. Han, L. Yu, C. Liu, Y. Liu and G. Wu, *ACS Sustain. Chem. Eng.*, 2018, **6**, 14542-14553.
- [S16]. X. Meng, P. Zong, L. Wang, F. Yang, W. Hou, S. Zhang, B. Li, Z. Guo, S. Liu, G. Zuo, Y. Du, T. Wang and V. A. L. Roy, *Catal. Commun.*, 2020, **134**, 105860.
- [S17]. J. Hu, T. Yang, J. Chen, X. Yang, J. Qu and Y. Cai, *Chem. Eng. J.*, 2022, **430**, 133039.
- [S18]. Y. Zhao, Y. Liu, Z. Wang, Y. Ma, Y. Zhou, X. Shi, Q. Wu, X. Wang, M. Shao, H. Huang, Y. Liu and Z. Kang, *Appl. Catal. B.*, 2021, **289**, 120035.
- [S19]. G. Han, F. Xu, B. Cheng, Y. Li, J. Yu and L. Zhang. *Acta Phys. Chim. Sin.*, 2022, **38**, 2112037.
- [S20]. B. Liu, C. Bie, Y. Zhang, L. Wang, Y. Li and J. Yu, *Langmuir.*, 2021, **37**, 14114-14124.
- [S21]. L. Wang, S. Cao, K. Guo, Z. Wu, Z. Ma and L. Piao, *Chinese J. Catal.*, 2019, **40**, 470-475.
- [S22]. Z. Jiang, B. Cheng, Y. Zhang, S. Wageh, A. A. Al-Ghamdi, J. Yu and L. Wang, *J. Mater. Sci. Technol.*, 2022, **124**, 193-201.
- [S23]. X. Chen, Y. Kuwahara, K. Mori, C. Louis and H. Yamashita, *J. Mater. Chem. A.*, 2020, **8**, 1904-1910.
- [S24]. R. Ma, L. Wang, H. Wang, Z. Liu, M. Xing, L. Zhu, X. Meng and F.-S. Xiao, *Appl. Catal. B.*, 2019, **244**, 594-603.
- [S25]. X. Chen, Y. Kondo, S. Li, Y. Kuwahara, K. Mori, D. Zhang, C. Louis and H. Yamashita, *J. Mater. Chem. A.*, 2021, **9**, 26371-26380.
